# Supplementary material
Source: PubMed Central journal article supplement (PMC1569648)
Supplement: pbio.0040274.st001.pdf [file pbio.0040274.st001.pdf]

Table S1. Distributions of different genotypes and conditions in aerotaxis assays in a 0-21% oxygen gradient.

Bins are equally spaced along the gradient as depicted in Figure 1A. Values are the fractions of animals in each bin. n, number of assays. Each assay represents 80-100 animals.

| Genotype                   | Food | n  | 1     | 2     | 3     | 4     | 5     | 6     | 7     | 8     | 9     |
|----------------------------|------|----|-------|-------|-------|-------|-------|-------|-------|-------|-------|
| N2                         | off  | 28 | 0.039 | 0.057 | 0.094 | 0.163 | 0.280 | 0.214 | 0.104 | 0.039 | 0.011 |
| <i>gcy-32</i>              | off  | 3  | 0.043 | 0.060 | 0.139 | 0.164 | 0.203 | 0.231 | 0.119 | 0.032 | 0.010 |
| <i>gcy-34</i>              | off  | 4  | 0.034 | 0.078 | 0.201 | 0.230 | 0.232 | 0.134 | 0.068 | 0.021 | 0.002 |
| <i>gcy-35</i>              | off  | 9  | 0.062 | 0.117 | 0.156 | 0.140 | 0.176 | 0.147 | 0.112 | 0.070 | 0.019 |
| <i>gcy-36</i>              | off  | 6  | 0.103 | 0.150 | 0.199 | 0.172 | 0.189 | 0.124 | 0.045 | 0.014 | 0.004 |
| <i>osm-9</i>               | off  | 7  | 0.122 | 0.113 | 0.161 | 0.142 | 0.160 | 0.130 | 0.102 | 0.056 | 0.015 |
| <i>ocr-2</i>               | off  | 3  | 0.046 | 0.149 | 0.217 | 0.268 | 0.175 | 0.096 | 0.045 | 0.004 | 0.000 |
| <i>qaIs2241</i>            | off  | 8  | 0.028 | 0.056 | 0.091 | 0.132 | 0.133 | 0.267 | 0.224 | 0.056 | 0.013 |
| <i>gcy-35; qaIs2241</i>    | off  | 4  | 0.088 | 0.104 | 0.139 | 0.104 | 0.151 | 0.180 | 0.161 | 0.057 | 0.016 |
| <i>osm-9; qaIs2241</i>     | off  | 4  | 0.086 | 0.113 | 0.126 | 0.165 | 0.141 | 0.177 | 0.119 | 0.047 | 0.026 |
| <i>ocr-2; qaIs2241</i>     | off  | 4  | 0.119 | 0.094 | 0.109 | 0.110 | 0.134 | 0.150 | 0.176 | 0.072 | 0.037 |
| <i>tph-1; qaIs2241</i>     | off  | 3  | 0.085 | 0.129 | 0.120 | 0.151 | 0.152 | 0.158 | 0.159 | 0.024 | 0.021 |
| <i>npr-1</i>               | off  | 4  | 0.013 | 0.037 | 0.086 | 0.236 | 0.287 | 0.210 | 0.082 | 0.031 | 0.018 |
| <i>npr-1 qaIs2241</i>      | off  | 3  | 0.027 | 0.053 | 0.102 | 0.113 | 0.182 | 0.202 | 0.208 | 0.089 | 0.023 |
| <i>gcy-35; npr-1</i>       | off  | 3  | 0.068 | 0.097 | 0.122 | 0.208 | 0.173 | 0.168 | 0.089 | 0.055 | 0.020 |
| <i>osm-9; npr-1</i>        | off  | 3  | 0.087 | 0.114 | 0.184 | 0.156 | 0.195 | 0.148 | 0.083 | 0.022 | 0.012 |
| <i>ocr-2; npr-1</i>        | off  | 3  | 0.020 | 0.084 | 0.181 | 0.244 | 0.259 | 0.128 | 0.059 | 0.022 | 0.002 |
| <i>tph-1; npr-1</i>        | off  | 4  | 0.029 | 0.054 | 0.118 | 0.196 | 0.259 | 0.169 | 0.132 | 0.033 | 0.010 |
| <i>daf-3 npr-1</i>         | off  | 3  | 0.039 | 0.053 | 0.082 | 0.168 | 0.242 | 0.188 | 0.139 | 0.058 | 0.030 |
| <i>daf-7</i>               | off  | 4  | 0.015 | 0.041 | 0.105 | 0.186 | 0.296 | 0.197 | 0.121 | 0.035 | 0.005 |
| <i>daf-3</i>               | off  | 3  | 0.068 | 0.069 | 0.117 | 0.148 | 0.221 | 0.174 | 0.119 | 0.059 | 0.025 |
| <i>daf-7; daf-3</i>        | off  | 4  | 0.036 | 0.047 | 0.123 | 0.180 | 0.221 | 0.172 | 0.140 | 0.059 | 0.021 |
| <i>tax-4; kyIs342</i>      | off  | 4  | 0.054 | 0.111 | 0.105 | 0.153 | 0.188 | 0.188 | 0.120 | 0.049 | 0.031 |
| <i>ADF::tph-1</i>          | off  | 4  | 0.044 | 0.066 | 0.065 | 0.151 | 0.263 | 0.254 | 0.117 | 0.030 | 0.010 |
| <i>tph-1</i>               | off  | 11 | 0.075 | 0.109 | 0.123 | 0.129 | 0.204 | 0.197 | 0.117 | 0.037 | 0.009 |
| <i>tph-1; daf-3</i>        | off  | 3  | 0.065 | 0.088 | 0.125 | 0.167 | 0.213 | 0.175 | 0.099 | 0.048 | 0.020 |
| <i>gcy-35; SDQ::gcy-35</i> | off  | 3  | 0.051 | 0.087 | 0.109 | 0.202 | 0.244 | 0.195 | 0.069 | 0.038 | 0.006 |
| <i>osm-9; ASH::osm-9</i>   | off  | 3  | 0.036 | 0.094 | 0.152 | 0.172 | 0.265 | 0.197 | 0.081 | 0.004 | 0.000 |
| <i>osm-9; ADF::osm-9</i>   | off  | 6  | 0.078 | 0.093 | 0.108 | 0.137 | 0.200 | 0.257 | 0.103 | 0.023 | 0.002 |
| <i>tph-1; ADF::tph-1</i>   | off  | 5  | 0.031 | 0.066 | 0.114 | 0.145 | 0.183 | 0.244 | 0.141 | 0.064 | 0.010 |
| <i>tph-1; NSM::tph-1</i>   | off  | 3  | 0.046 | 0.145 | 0.123 | 0.119 | 0.101 | 0.217 | 0.194 | 0.049 | 0.006 |
| N2                         | on   | 10 | 0.152 | 0.109 | 0.119 | 0.152 | 0.154 | 0.120 | 0.088 | 0.071 | 0.035 |
| <i>gcy-35</i>              | on   | 3  | 0.254 | 0.109 | 0.089 | 0.120 | 0.172 | 0.116 | 0.070 | 0.044 | 0.026 |
| <i>gcy-36</i>              | on   | 3  | 0.204 | 0.096 | 0.128 | 0.128 | 0.183 | 0.087 | 0.087 | 0.063 | 0.025 |
| <i>osm-9</i>               | on   | 3  | 0.203 | 0.097 | 0.122 | 0.183 | 0.159 | 0.112 | 0.071 | 0.049 | 0.005 |
| <i>ocr-2</i>               | on   | 3  | 0.162 | 0.093 | 0.112 | 0.135 | 0.177 | 0.150 | 0.100 | 0.050 | 0.021 |
| <i>qaIs2241</i>            | on   | 4  | 0.159 | 0.108 | 0.089 | 0.108 | 0.099 | 0.137 | 0.161 | 0.095 | 0.043 |
| <i>npr-1</i>               | on   | 7  | 0.047 | 0.031 | 0.070 | 0.109 | 0.253 | 0.227 | 0.127 | 0.091 | 0.046 |
| <i>npr-1 qaIs2241</i>      | on   | 3  | 0.179 | 0.074 | 0.092 | 0.096 | 0.120 | 0.158 | 0.125 | 0.091 | 0.065 |
| <i>gcy-35; npr-1</i>       | on   | 4  | 0.181 | 0.099 | 0.116 | 0.131 | 0.151 | 0.127 | 0.101 | 0.077 | 0.017 |
| <i>osm-9; npr-1</i>        | on   | 3  | 0.142 | 0.089 | 0.140 | 0.134 | 0.189 | 0.122 | 0.092 | 0.064 | 0.028 |
| <i>ocr-2; npr-1</i>        | on   | 3  | 0.107 | 0.088 | 0.133 | 0.157 | 0.224 | 0.144 | 0.090 | 0.038 | 0.020 |
| <i>tph-1; npr-1</i>        | on   | 3  | 0.045 | 0.061 | 0.114 | 0.167 | 0.155 | 0.218 | 0.161 | 0.059 | 0.020 |
| <i>daf-3 npr-1</i>         | on   | 3  | 0.035 | 0.047 | 0.066 | 0.130 | 0.170 | 0.239 | 0.173 | 0.076 | 0.064 |
| <i>daf-7</i>               | on   | 6  | 0.038 | 0.058 | 0.086 | 0.139 | 0.188 | 0.212 | 0.147 | 0.084 | 0.048 |
| <i>daf-3</i>               | on   | 3  | 0.150 | 0.064 | 0.080 | 0.099 | 0.165 | 0.141 | 0.136 | 0.091 | 0.073 |
| <i>daf-7; daf-3</i>        | on   | 3  | 0.183 | 0.093 | 0.090 | 0.100 | 0.132 | 0.139 | 0.125 | 0.091 | 0.048 |
| <i>tax-4; kyIs342</i>      | on   | 3  | 0.052 | 0.085 | 0.109 | 0.117 | 0.155 | 0.212 | 0.195 | 0.048 | 0.025 |
| <i>tph-1</i>               | on   | 5  | 0.075 | 0.120 | 0.103 | 0.173 | 0.147 | 0.179 | 0.125 | 0.057 | 0.023 |
| <i>tph-1; daf-3</i>        | on   | 3  | 0.048 | 0.069 | 0.103 | 0.131 | 0.205 | 0.192 | 0.152 | 0.078 | 0.021 |
| <i>tph-1; ADF::tph-1</i>   | on   | 5  | 0.060 | 0.089 | 0.083 | 0.158 | 0.192 | 0.178 | 0.144 | 0.068 | 0.029 |
| <i>ADF::tph-1</i>          | on   | 5  | 0.078 | 0.073 | 0.095 | 0.123 | 0.175 | 0.198 | 0.127 | 0.092 | 0.040 |
