# Supplementary material
Source: PubMed Central journal article supplement (PMC1569648)
Supplement: pbio.0040274.st002.pdf [file pbio.0040274.st002.pdf]

Table S2 (p. 1). Chi-square comparisons from this study.

n, total number of animals tested for a given genotype and condition.

| Group 1                    |      |      | Group 2               |      |      | Chi-Square |
|----------------------------|------|------|-----------------------|------|------|------------|
| Genotype                   | Food | n    | Genotype              | Food | n    |            |
| N2                         | off  | 2774 | <i>gcy-36</i>         | off  | 553  | 191 **     |
| N2                         | off  | 2774 | <i>gcy-35</i>         | off  | 823  | 117 **     |
| N2                         | off  | 2774 | <i>gcy-34</i>         | off  | 384  | 53 **      |
| N2                         | off  | 2774 | <i>gcy-32</i>         | off  | 306  | 13         |
| N2                         | off  | 2774 | <i>qaIs2241</i>       | off  | 801  | 121 **     |
| N2                         | off  | 2774 | <i>osm-9</i>          | off  | 601  | 158 **     |
| N2                         | off  | 2774 | <i>ocr-2</i>          | off  | 203  | 82 **      |
| N2                         | off  | 2774 | <i>tph-1</i>          | off  | 1076 | 79 **      |
| N2                         | off  | 2774 | <i>npr-1</i>          | off  | 414  | 20         |
| N2                         | off  | 2774 | <i>daf-7</i>          | off  | 403  | 13         |
| N2                         | off  | 2774 | <i>daf-3</i>          | off  | 289  | 18         |
| N2                         | off  | 2774 | <i>tax-4; kyIs342</i> | off  | 396  | 42 **      |
| N2                         | off  | 2774 | <i>ADF::tph-1</i>     | off  | 422  | 8          |
|                            |      |      |                       |      |      |            |
| <i>gcy-35; qaIs2241</i>    | off  | 427  | <i>qaIs2241</i>       | off  | 801  | 44 **      |
| <i>gcy-35; qaIs2241</i>    | off  | 427  | <i>gcy-35</i>         | off  | 823  | 18         |
| <i>osm-9; qaIs2241</i>     | off  | 429  | <i>qaIs2241</i>       | off  | 801  | 76 **      |
| <i>osm-9; qaIs2241</i>     | off  | 429  | <i>osm-9</i>          | off  | 601  | 7          |
| <i>ocr-2; qaIs2241</i>     | off  | 378  | <i>qaIs2241</i>       | off  | 801  | 64 **      |
| <i>ocr-2; qaIs2241</i>     | off  | 378  | <i>ocr-2</i>          | off  | 203  | 76 **      |
| <i>tph-1; qaIs2241</i>     | off  | 282  | <i>qaIs2241</i>       | off  | 801  | 50 **      |
| <i>tph-1; qaIs2241</i>     | off  | 282  | <i>tph-1</i>          | off  | 1076 | 13         |
|                            |      |      |                       |      |      |            |
| <i>npr-1 qaIs2241</i>      | off  | 318  | <i>npr-1</i>          | off  | 414  | 51 **      |
| <i>npr-1 qaIs2241</i>      | off  | 318  | <i>qaIs2241</i>       | off  | 801  | 10         |
| <i>gcy-35; npr-1</i>       | off  | 311  | <i>npr-1</i>          | off  | 414  | 42 **      |
| <i>gcy-35; npr-1</i>       | off  | 311  | <i>gcy-35</i>         | off  | 823  | 12         |
| <i>osm-9; npr-1</i>        | off  | 364  | <i>npr-1</i>          | off  | 414  | 69 **      |
| <i>osm-9; npr-1</i>        | off  | 364  | <i>osm-9</i>          | off  | 601  | 16         |
| <i>ocr-2; npr-1</i>        | off  | 404  | <i>npr-1</i>          | off  | 414  | 39 **      |
| <i>ocr-2; npr-1</i>        | off  | 404  | <i>ocr-2</i>          | off  | 203  | 13         |
| <i>tph-1; npr-1</i>        | off  | 406  | <i>npr-1</i>          | off  | 414  | 13         |
| <i>tph-1; npr-1</i>        | off  | 406  | <i>tph-1</i>          | off  | 1076 | 34 **      |
| <i>daf-3 npr-1</i>         | off  | 274  | <i>npr-1</i>          | off  | 414  | 5          |
| <i>daf-3 npr-1</i>         | off  | 274  | <i>daf-3</i>          | off  | 289  | 19         |
|                            |      |      |                       |      |      |            |
| <i>daf-7; daf-3</i>        | off  | 388  | <i>daf-7</i>          | off  | 403  | 16         |
| <i>daf-7; daf-3</i>        | off  | 388  | <i>daf-3</i>          | off  | 289  | 6          |
| <i>tph-1; daf-3</i>        | off  | 303  | <i>tph-1</i>          | off  | 1076 | 8          |
| <i>tph-1; daf-3</i>        | off  | 303  | <i>daf-3</i>          | off  | 289  | 2          |
|                            |      |      |                       |      |      |            |
| <i>gcy-35; SDQ::gcy-35</i> | off  | 325  | <i>gcy-35</i>         | off  | 823  | 31 **      |
| <i>gcy-35; SDQ::gcy-35</i> | off  | 325  | N2                    | off  | 2774 | 16         |
| <i>osm-9; ASH::osm-9</i>   | off  | 269  | <i>osm-9</i>          | off  | 601  | 52 **      |
| <i>osm-9; ASH::osm-9</i>   | off  | 269  | N2                    | off  | 2774 | 28 **      |
| <i>osm-9; ADF::osm-9</i>   | off  | 532  | <i>osm-9</i>          | off  | 601  | 50 **      |
| <i>osm-9; ADF::osm-9</i>   | off  | 532  | N2                    | off  | 2774 | 50 **      |
| <i>tph-1; ADF::tph-1</i>   | off  | 500  | <i>tph-1</i>          | off  | 1076 | 30 **      |
| <i>tph-1; ADF::tph-1</i>   | off  | 500  | N2                    | off  | 2774 | 32 **      |
| <i>tph-1; NSM::tph-1</i>   | off  | 308  | <i>tph-1</i>          | off  | 1076 | 32 **      |
| <i>tph-1; NSM::tph-1</i>   | off  | 308  | N2                    | off  | 2774 | 92 **      |

\*  $P < 0.01$

\*\*  $P < 0.001$

Table S2 (p.2). Chi-square comparisons from this study.

n, total number of animals tested for a given genotype and condition.

| Group 1                  |      |      | Group 2                  |      |     | Chi-Square |
|--------------------------|------|------|--------------------------|------|-----|------------|
| Genotype                 | Food | n    | Genotype                 | Food | n   |            |
| N2                       | off  | 2774 | N2                       | on   | 848 | 248 **     |
| <i>gcy-35</i>            | off  | 823  | <i>gcy-35</i>            | on   | 240 | 81 **      |
| <i>qaIs2241</i>          | off  | 801  | <i>qaIs2241</i>          | on   | 346 | 103 **     |
| <i>osm-9</i>             | off  | 601  | <i>osm-9</i>             | on   | 249 | 19         |
| <i>ocr-2</i>             | off  | 203  | <i>ocr-2</i>             | on   | 254 | 49 **      |
| <i>npr-1</i>             | off  | 414  | <i>npr-1</i>             | on   | 627 | 44 **      |
| <i>npr-1 qaIs2241</i>    | off  | 318  | <i>npr-1 qaIs2241</i>    | on   | 243 | 49 **      |
| <i>gcy-35; npr-1</i>     | off  | 311  | <i>gcy-35; npr-1</i>     | on   | 294 | 26 **      |
| <i>osm-9; npr-1</i>      | off  | 364  | <i>osm-9; npr-1</i>      | on   | 337 | 19         |
| <i>ocr-2; npr-1</i>      | off  | 404  | <i>ocr-2; npr-1</i>      | on   | 308 | 41 **      |
| <i>tph-1; npr-1</i>      | off  | 406  | <i>tph-1; npr-1</i>      | on   | 312 | 19         |
| <i>daf-3 npr-1</i>       | off  | 274  | <i>daf-3 npr-1</i>       | on   | 281 | 13         |
| <i>daf-7</i>             | off  | 403  | <i>daf-7</i>             | on   | 589 | 47 **      |
| <i>daf-3</i>             | off  | 289  | <i>daf-3</i>             | on   | 197 | 22 *       |
| <i>daf-7; daf-3</i>      | off  | 388  | <i>daf-7; daf-3</i>      | on   | 233 | 58 **      |
| <i>tax-4; kyIs342</i>    | off  | 396  | <i>tax-4; kyIs342</i>    | on   | 311 | 12         |
| <i>tph-1</i>             | off  | 1076 | <i>tph-1</i>             | on   | 436 | 23 *       |
| <i>tph-1; daf-3</i>      | off  | 303  | <i>tph-1; daf-3</i>      | on   | 287 | 9          |
| <i>tph-1; ADF::tph-1</i> | off  | 500  | <i>tph-1; ADF::tph-1</i> | on   | 488 | 18         |
| <i>ADF::tph-1</i>        | off  | 422  | <i>ADF::tph-1</i>        | on   | 458 | 37 **      |
|                          |      |      |                          |      |     |            |
| N2                       | on   | 848  | <i>qaIs2241</i>          | on   | 346 | 19         |
| N2                       | on   | 848  | <i>gcy-35</i>            | on   | 240 | 19         |
| N2                       | on   | 848  | <i>osm-9</i>             | on   | 249 | 15         |
| N2                       | on   | 848  | <i>ocr-2</i>             | on   | 254 | 6          |
| N2                       | on   | 848  | <i>npr-1</i>             | on   | 627 | 114 **     |
| N2                       | on   | 848  | <i>daf-7</i>             | on   | 589 | 82 **      |
| N2                       | on   | 848  | <i>daf-3</i>             | on   | 197 | 18         |
| N2                       | on   | 848  | <i>tax-4; kyIs342</i>    | on   | 311 | 56 **      |
| N2                       | on   | 848  | <i>tph-1</i>             | on   | 436 | 27 **      |
| N2                       | on   | 848  | <i>tph-1; daf-3</i>      | on   | 287 | 40 **      |
| N2                       | on   | 848  | <i>tph-1; ADF::tph-1</i> | on   | 488 | 43 **      |
| N2                       | on   | 848  | <i>ADF::tph-1</i>        | on   | 458 | 35 **      |
|                          |      |      |                          |      |     |            |
| <i>npr-1 qaIs2241</i>    | on   | 243  | <i>npr-1</i>             | on   | 627 | 61 **      |
| <i>npr-1 qaIs2241</i>    | on   | 243  | <i>qaIs2241</i>          | on   | 346 | 6          |
| <i>gcy-35; npr-1</i>     | on   | 294  | <i>npr-1</i>             | on   | 627 | 86 **      |
| <i>gcy-35; npr-1</i>     | on   | 294  | <i>gcy-35</i>            | on   | 240 | 8          |
| <i>osm-9; npr-1</i>      | on   | 337  | <i>npr-1</i>             | on   | 627 | 63 **      |
| <i>osm-9; npr-1</i>      | on   | 337  | <i>osm-9</i>             | on   | 249 | 15         |
| <i>ocr-2; npr-1</i>      | on   | 308  | <i>npr-1</i>             | on   | 627 | 53 **      |
| <i>ocr-2; npr-1</i>      | on   | 308  | <i>ocr-2</i>             | on   | 254 | 8          |
| <i>tph-1; npr-1</i>      | on   | 312  | <i>npr-1</i>             | on   | 627 | 34 **      |
| <i>tph-1; npr-1</i>      | on   | 312  | <i>tph-1</i>             | on   | 436 | 13         |
| <i>daf-3 npr-1</i>       | on   | 281  | <i>npr-1</i>             | on   | 627 | 18         |
| <i>daf-3 npr-1</i>       | on   | 281  | <i>daf-3</i>             | on   | 197 | 28 **      |
|                          |      |      |                          |      |     |            |
| <i>daf-7; daf-3</i>      | on   | 233  | <i>daf-7</i>             | on   | 589 | 54 **      |
| <i>daf-7; daf-3</i>      | on   | 233  | <i>daf-3</i>             | on   | 197 | 3          |
| <i>tph-1; daf-3</i>      | on   | 287  | <i>tph-1</i>             | on   | 436 | 14         |
| <i>tph-1; daf-3</i>      | on   | 287  | <i>daf-3</i>             | on   | 197 | 25 *       |

\*  $P < 0.01$

\*\*  $P < 0.001$
